# Supplementary figures and images for: Conformation dynamics of the intrinsically disordered protein c-Myb with the ff99IDPs force field
Source: Royal Society of Chemistry journal article supplement (doi:10.1039/c7ra04133k), 2017-01-01

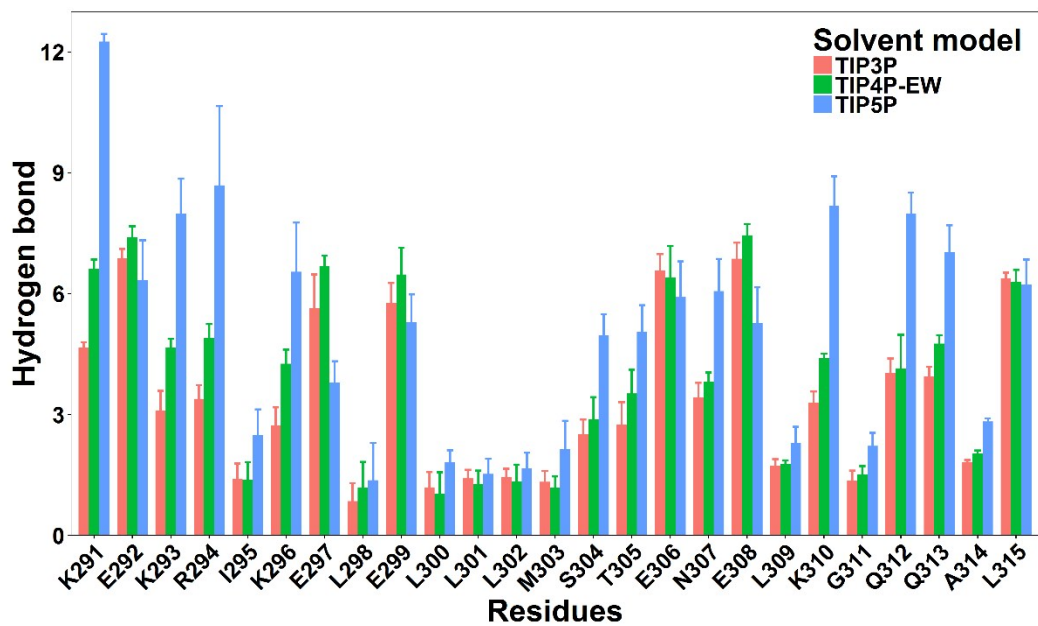

Figure S1. Hydrogen bond between water and c-Myb for different solvent models.

Supplement: c7ra04133k1.pdf [file c7ra04133k1.pdf]
